# Supplementary material
Source: publisher site journal article supplement (https://neobiota.pensoft.net/article/73734/download/suppl/31/)
Supplement: Supplementary file 1

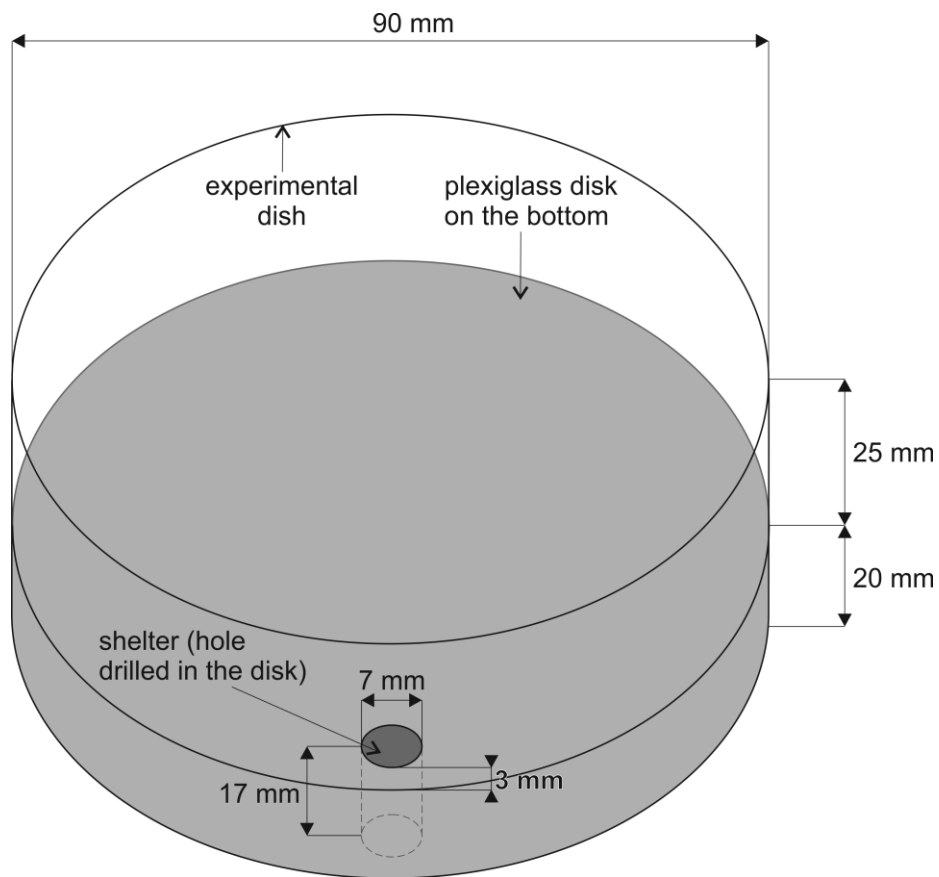

**Figure S1.** Experimental setup

**Table S1.** Numbers of particular amphipod pairs obtained in the study.

| Amphipod species                  | Infection status     | <i>D. haemobaphes</i> |     | <i>D. villosus</i> |     |
|-----------------------------------|----------------------|-----------------------|-----|--------------------|-----|
|                                   |                      | N-inf                 | Inf | N-inf              | Inf |
| <i>Dikerogammarus haemobaphes</i> | Non-infected (N-inf) | 44                    |     |                    |     |
|                                   | Infected (Inf)       | 18                    | 18  |                    |     |
| <i>Dikerogammarus villosus</i>    | Non-infected (N-inf) | 175                   | 27  | 73                 |     |
|                                   | Infected (Inf)       | 16                    | 36  | 80                 | 66  |

**Table S2.** Analyses carried out within the study. Responding individuals (bolded) are used for the analysis, accompanying individuals are the pair members whose impact on the responding individuals is being tested.

| Analysis                                                             | Comparison                                                                   | Data subset<br>( <b>responding</b> /accompanying individual) <sup>1, 2</sup>                                                                                                                                 | Variables in the model <sup>3</sup>                                                                                                     |
|----------------------------------------------------------------------|------------------------------------------------------------------------------|--------------------------------------------------------------------------------------------------------------------------------------------------------------------------------------------------------------|-----------------------------------------------------------------------------------------------------------------------------------------|
| <b>1. Intraspecific relationships</b>                                |                                                                              |                                                                                                                                                                                                              |                                                                                                                                         |
| A                                                                    | Effect of own infection on responses to non-infected conspecifics            | <ul style="list-style-type: none"> <li>• <b>N-inf Dh</b>/N-inf Dh</li> <li>• <b>Inf Dh</b>/N-inf Dh</li> <li>• <b>N-inf Dv</b>/N-inf Dv</li> <li>• <b>Inf Dv</b>/N-inf Dv</li> </ul>                         | <ul style="list-style-type: none"> <li>• Species 1</li> <li>• Infection 1</li> <li>• Mass ratio</li> </ul>                              |
| B                                                                    | Effect of own infection on responses to infected conspecifics                | <ul style="list-style-type: none"> <li>• <b>Inf Dh</b>/Inf Dh</li> <li>• <b>N-inf Dh</b>/Inf Dh</li> <li>• <b>Inf Dv</b>/Inf Dv</li> <li>• <b>N-inf Dv</b>/Inf Dv</li> </ul>                                 |                                                                                                                                         |
| C                                                                    | Effect of the accompanying conspecific infection on non-infected individuals | <ul style="list-style-type: none"> <li>• <b>N-inf Dh</b>/N-inf Dh</li> <li>• <b>N-inf Dh</b>/Inf Dh</li> <li>• <b>N-inf Dv</b>/N-inf Dv</li> <li>• <b>N-inf Dv</b>/Inf Dv</li> </ul>                         | <ul style="list-style-type: none"> <li>• Species 1</li> <li>• Infection 2</li> <li>• Mass ratio</li> </ul>                              |
| D                                                                    | Effect of the accompanying conspecific infection on infected individuals     | <ul style="list-style-type: none"> <li>• <b>Inf Dh</b>/Inf Dh</li> <li>• <b>Inf Dh</b>/N-inf Dh</li> <li>• <b>Inf Dv</b>/Inf Dv</li> <li>• <b>Inf Dv</b>/N-inf Dv</li> </ul>                                 |                                                                                                                                         |
| <b>2. Comparisons between intra- and interspecific relationships</b> |                                                                              |                                                                                                                                                                                                              |                                                                                                                                         |
| E                                                                    | Effect of the accompanying species identity on Dh                            | <ul style="list-style-type: none"> <li>• <b>N-inf Dh</b>/N-inf Dh</li> <li>• <b>N-inf Dh</b>/N-inf Dv</li> <li>• <b>Inf Dh</b>/N-inf Dh</li> <li>• <b>Inf Dh</b>/N-inf Dv</li> </ul>                         | <ul style="list-style-type: none"> <li>• Species 2</li> <li>• Infection 1</li> <li>• Mass ratio</li> </ul>                              |
| F                                                                    | Effect of the accompanying species identity on Dv                            | <ul style="list-style-type: none"> <li>• <b>N-inf Dv</b>/N-inf Dv</li> <li>• <b>N-inf Dv</b>/N-inf Dh</li> <li>• <b>Inf Dv</b>/N-inf Dv</li> <li>• <b>Inf Dv</b>/N-inf Dh</li> </ul>                         |                                                                                                                                         |
| <b>3. Interspecific relationships</b>                                |                                                                              |                                                                                                                                                                                                              |                                                                                                                                         |
| G                                                                    | Effect of own infection and the accompanying heterospecific infection        | <ul style="list-style-type: none"> <li>• <b>N-inf Dh</b>/N-inf <b>Dv</b></li> <li>• <b>N-inf Dh</b>/Inf <b>Dv</b></li> <li>• <b>Inf Dh</b>/N-inf <b>Dv</b></li> <li>• <b>Inf Dh</b>/Inf <b>Dv</b></li> </ul> | <ul style="list-style-type: none"> <li>• Species 1<sup>4</sup></li> <li>• Infection 1</li> <li>• Infection 2</li> <li>• Mass</li> </ul> |
| <b>4. Intra- and interspecific relationships</b>                     |                                                                              |                                                                                                                                                                                                              |                                                                                                                                         |
| H                                                                    | Time spent together in shelter                                               | All pair combinations (n-inf, inf, conspecific, heterosp.)                                                                                                                                                   | <ul style="list-style-type: none"> <li>• Pair composition</li> <li>• Mass ratio</li> </ul>                                              |

<sup>1</sup> Responding individuals from uniform pairs (conspecifics of the same infections status) selected at random (analyses A-F)

<sup>2</sup> Dh – *Dikerogammarus haemobaphes*, Dv – *Dikerogammarus villosus*;  
Inf – infected, N-inf – non-infected

<sup>3</sup> Species 1, 2 – species identity of the responding and accompanying individual, respectively; Infection 1, 2 – infection status of the responding and accompanying individual, respectively; Mass ratio: responding/accompanying individual (analyses A-F) or larger/ smaller individual (analysis H);  
mass – individual mass (analysis G)

<sup>4</sup> In analysis H, both members of the pair were used as responding individuals, thus Species1 was modelled as a within-subject factor
